# Supplementary material for: A diet-specific microbiota drives Salmonella Typhimurium to adapt its in vivo response to plant-derived substrates
Source: PubMed Central journal article supplement (PMC7972205; doi:10.1186/s42523-021-00082-8), 2021-03-17
Supplement: 42523_2021_82_MOESM2_ESM.pdf [file 42523_2021_82_MOESM2_ESM.pdf]

**TABLE S1. Significant influences of two diets on the microbiota composition.** W, Wilcoxon rank sum test; F, Fisher's exact test; n, number of mice underlying statistic calculation; SD, standard deviation; WD, Westernized diet; PD, plant-based diet.

| <b>Phylum level</b>    |                                     |                    |                    |          |        |          |          |        |        |
|------------------------|-------------------------------------|--------------------|--------------------|----------|--------|----------|----------|--------|--------|
| Phylum                 | <i>p</i> value (W)                  | <i>p</i> value (F) | WD                 |          |        | PD       |          |        |        |
|                        |                                     |                    | mean [%]           | n        | SD [%] | mean [%] | n        | SD [%] |        |
| <i>Actinobacteria</i>  | 0.0242                              |                    | 1.79               | 8        | 1.53   | 0.32     | 3        | 0.21   |        |
| <i>Cyanobacteria</i>   |                                     | 0.0373             | 0.66               | 5        | 0.88   |          | 0        |        |        |
| <i>Deferribacteres</i> | 0.0011                              | 0.0013             | 2.98               | 12       | 1.43   | 0.35     | 4        | 0.28   |        |
| <i>Proteobacteria</i>  | 0.0001                              |                    | 5.17               | 12       | 2.05   | 2.11     | 11       | 0.56   |        |
| <i>Tenericutes</i>     |                                     | 0.0001             |                    | 0        |        | 2.57     | 9        | 2.61   |        |
| <b>Class level</b>     |                                     |                    |                    |          |        |          |          |        |        |
| Phylum                 | Class                               | <i>p</i> value (W) | <i>p</i> value (F) | WD       |        |          | PD       |        |        |
|                        |                                     |                    |                    | mean [%] | n      | SD [%]   | mean [%] | n      | SD [%] |
| <i>Actinobacteria</i>  | <i>Coriobacteriia</i>               |                    | 0.0361             | 1.59     | 8      | 1.35     | 0.29     | 2      | 0.18   |
| <i>Cyanobacteria</i>   | <i>Melainabacteria</i>              |                    | 0.0373             | 0.66     | 5      | 0.88     |          | 0      |        |
| <i>Deferribacteres</i> | <i>Deferribacteres</i>              | 0.0011             | 0.0013             | 2.98     | 12     | 1.43     | 0.35     | 4      | 0.28   |
| <i>Proteobacteria</i>  | <i>δ-Proteobacteria</i>             | 0.0013             | 0.0137             | 4.24     | 12     | 2.03     | 0.71     | 6      | 0.63   |
|                        | <i>γ-Proteobacteria</i>             |                    | 0.0137             | 0.46     | 6      | 0.30     | 1.24     | 11     | 0.63   |
| <i>Tenericutes</i>     | <i>Mollicutes</i>                   |                    | 0.0001             |          | 0      |          | 2.57     | 9      | 2.61   |
| <b>Family level</b>    |                                     |                    |                    |          |        |          |          |        |        |
| Phylum                 | Family                              | <i>p</i> value (W) | <i>p</i> value (F) | WD       |        |          | PD       |        |        |
|                        |                                     |                    |                    | mean [%] | n      | SD [%]   | mean [%] | n      | SD [%] |
| <i>Actinobacteria</i>  | <i>Atopobiaceae</i>                 |                    | 0.0272             | 1.48     | 7      | 1.34     | 0.26     | 1      |        |
| <i>Bacteroidetes</i>   | <i>Marinifilaceae</i>               |                    | 0.000              | 0.14     | 1      |          | 1.95     | 11     | 0.63   |
|                        | <i>Muribaculaceae</i>               | 0.0156             |                    | 32.42    | 12     | 4.71     | 43.01    | 11     | 11.18  |
|                        | <i>Prevotellaceae</i>               | 0.0056             |                    | 1.00     | 9      | 0.52     | 1.62     | 9      | 0.69   |
|                        | <i>Rikenellaceae</i>                | 0.0156             |                    | 15.50    | 12     | 6.51     | 9.92     | 11     | 1.76   |
|                        | <i>Tannerellaceae</i>               |                    | 0.0000             | 10.63    | 12     | 8.47     | 0.26     | 1      |        |
| <i>Cyanobacteria</i>   | <i>unknown. Gastranaerophilales</i> |                    | 0.0373             | 0.66     | 5      | 0.88     |          | 0      |        |
| <i>Deferribacteres</i> | <i>Deferribacteraceae</i>           | 0.0011             | 0.0013             | 2.98     | 12     | 1.43     | 0.35     | 4      | 0.28   |

| <i>Firmicutes</i>      | <i>Lachnospiraceae</i>               | 0.0156             |                    | 13.10    | 12   | 5.98   | 25.61    | 11   | 12.51  |
|------------------------|--------------------------------------|--------------------|--------------------|----------|------|--------|----------|------|--------|
|                        | <i>Ruminococcaceae</i>               | 0.0000             |                    | 8.49     | 12   | 3.18   | 3.28     | 11   | 1.61   |
| <i>Proteobacteria</i>  | <i>Burkholderiaceae</i>              |                    | 0.0046             | 0.39     | 5    | 0.25   | 1.17     | 11   | 0.59   |
|                        | <i>Desulfovibrionaceae</i>           | 0.0013             | 0.0137             | 4.24     | 12   | 2.03   | 0.71     | 6    | 0.63   |
| <i>Tenericutes</i>     | <i>Anaeroplasmataceae</i>            |                    | 0.0001             |          | 0    |        | 2.57     | 9    | 2.61   |
| <b>Genus level</b>     |                                      |                    |                    |          |      |        |          |      |        |
| Phylum                 | Genus                                | <i>p</i> value (W) | <i>p</i> value (F) | WD       |      |        | PD       |      |        |
|                        |                                      |                    |                    | mean [%] | n    | SD [%] | mean [%] | n    | SD [%] |
| <i>Bacteroidetes</i>   | <i>Alistipes</i>                     |                    | 0.0225             | 14.18    | 12   | 6.33   | 9.08     | 11   | 1.64   |
|                        | <i>Muribaculum</i>                   |                    | 0.0000             |          | 0    |        | 5.66     | 11   | 1.38   |
|                        | <i>Odoribacter</i>                   |                    | 0.0000             | 0.14     | 1    |        | 1.95     | 11   | 0.63   |
|                        | <i>Parabacteroides</i>               |                    | 0.0000             | 10.63    | 12   | 8.47   | 0.26     | 1    |        |
|                        | <i>Prevotellaceae UCG-001</i>        |                    | 0.0000             |          | 0    |        | 1.17     | 9    | 0.57   |
| <i>Deferribacteres</i> | <i>Mucispirillum</i>                 | 0.0011             | 0.0013             | 2.98     | 12   | 1.43   | 0.35     | 4    | 0.28   |
| <i>Firmicutes</i>      | <i>Blautia</i>                       | 0.0044             | 0.0003             | 8.29     | 12   | 4.33   | 0.45     | 3    | 0.43   |
|                        | <i>Faecalibaculum</i>                | 0.0030             |                    | 3.09     | 12   | 2.01   | 1.00     | 8    | 0.50   |
|                        | <i>Flavonifractor</i>                |                    | 0.0006             | 1.27     | 11   | 0.50   | 0.28     | 2    | 0.26   |
|                        | <i>Lachnospiraceae NK4A136 group</i> |                    | 0.0000             | 0.47     | 1    |        | 10.59    | 11   | 4.86   |
|                        | <i>Lachnospiraceae UCG-006</i>       |                    | 0.0000             |          | 0    |        | 2.30     | 10   | 1.39   |
|                        | <i>Ruminiclostridium 9</i>           | 0.0138             |                    | 1.45     | 12   | 0.54   | 0.86     | 10   | 0.32   |
|                        | unbek. <i>Ruminiclostridium</i>      | 0.0012             |                    | 2.87     | 11   | 2.11   | 0.80     | 7    | 0.47   |
| <i>Turicibacter</i>    |                                      | 0.0123             | 0.17               | 2        | 0.18 | 0.84   | 8        | 0.58 |        |
| <i>Proteobacteria</i>  | <i>Parasutterella</i>                |                    | 0.0046             | 0.39     | 5    | 0.25   | 1.17     | 11   | 0.59   |
| <i>Tenericutes</i>     | <i>Anaeroplasma</i>                  | 0.0001             |                    |          | 0    |        | 2.57     | 9    | 2.61   |
