# Supplementary material for: A diet-specific microbiota drives Salmonella Typhimurium to adapt its in vivo response to plant-derived substrates
Source: PubMed Central journal article supplement (PMC7972205; doi:10.1186/s42523-021-00082-8), 2021-03-17
Supplement: 42523_2021_82_MOESM5_ESM.pdf [file 42523_2021_82_MOESM5_ESM.pdf]

**TABLE S4. Significant influences of streptomycin on the microbiota composition.** W, Wilcoxon Rank Sum Test; F, Fisher's Exact Test; n, number of mice harboring species; SD, standard deviation; WD, Westernized diet; PD, plant-based diet.

| <b>Family level (WD)</b>                    |                    |                    |           |    |        |                      |    |        |
|---------------------------------------------|--------------------|--------------------|-----------|----|--------|----------------------|----|--------|
| Family                                      | <i>p</i> value (W) | <i>p</i> value (F) | untreated |    |        | streptomycin treated |    |        |
|                                             |                    |                    | mean [%]  | n  | SD [%] | mean [%]             | n  | SD [%] |
| <i>Atopobiaceae</i>                         | 0.01               | 0.09               | 1.48      | 7  | 1.34   | 53.12                | 11 | 30.19  |
| <i>Bacteroidaceae</i>                       |                    | 0.00               | 4.39      | 12 | 1.81   | 0.04                 | 0  | 0.05   |
| <i>Burkholderiaceae</i>                     |                    | 0.07               | 0.39      | 5  | 0.25   | 0.04                 | 0  | 0.09   |
| <i>Coriobacteriaceae</i>                    |                    | 0.00               | 0.20      | 1  | 0.19   | 7.39                 | 9  | 4.30   |
| <i>Deferribacteraceae</i>                   | 0.01               |                    | 2.98      | 12 | 1.43   | 23.94                | 11 | 24.12  |
| <i>Desulfo-<br/>vibrionaceae</i>            | 0.07               | 0.00               | 4.24      | 12 | 2.03   | 0.25                 | 2  | 0.49   |
| <i>Lachnospiraceae</i>                      | 0.00               |                    | 13.10     | 12 | 5.98   | 2.32                 | 8  | 3.38   |
| <i>Muribaculaceae</i>                       | 0.00               | 0.04               | 32.42     | 12 | 4.71   | 2.29                 | 6  | 3.59   |
| <i>Prevotellaceae</i>                       |                    | 0.00               | 1.00      | 9  | 0.52   | 0.01                 | 0  | 0.02   |
| <i>Rikenellaceae</i>                        | 0.05               | 0.00               | 15.50     | 12 | 6.51   | 0.27                 | 2  | 0.47   |
| <i>Ruminococcaceae</i>                      | 0.00               |                    | 8.49      | 12 | 3.18   | 2.11                 | 9  | 1.74   |
| <i>Tannerellaceae</i>                       |                    | 0.00               | 10.63     | 12 | 8.47   | 0.03                 | 0  | 0.05   |
| unknown<br><i>Gastranaero-<br/>philales</i> |                    | 0.19               | 0.66      | 5  | 0.88   | 0.06                 | 0  | 0.13   |

| <b>Family level (PD)</b>        |                    |                    |           |    |        |                      |   |        |
|---------------------------------|--------------------|--------------------|-----------|----|--------|----------------------|---|--------|
| Family                          | <i>p</i> value (W) | <i>p</i> value (F) | untreated |    |        | streptomycin treated |   |        |
|                                 |                    |                    | mean [%]  | n  | SD [%] | mean [%]             | n | SD [%] |
| <i>Anaero-<br/>plasmataceae</i> |                    | 0.02               | 2.57      | 9  | 2.61   | 4.75                 | 1 | 12.13  |
| <i>Atopobiaceae</i>             |                    | 0.00               | 0.26      | 1  | 0.17   | 54.27                | 8 | 35.40  |
| <i>Bacteroidaceae</i>           |                    | 0.01               | 4.25      | 11 | 2.26   | 5.89                 | 3 | 14.57  |

|                                  |      |      |       |    |       |      |   |      |
|----------------------------------|------|------|-------|----|-------|------|---|------|
| <i>Burkholderiaceae</i>          |      | 0.00 | 1.17  | 11 | 0.59  | 0.32 | 1 | 0.58 |
| <i>Coriobacteriaceae</i>         |      | 0.00 | 0.03  | 0  | 0.03  | 7.68 | 7 | 5.03 |
| <i>Desulfo-<br/>vibrionaceae</i> |      | 0.03 | 0.71  | 6  | 0.63  | 0.01 | 0 | 0.02 |
| <i>Erysipelotrichaceae</i>       |      | 0.09 | 2.06  | 10 | 1.07  | 1.12 | 3 | 1.76 |
| <i>Lachnospiraceae</i>           | 0.00 |      | 25.61 | 11 | 12.51 | 2.34 | 6 | 3.90 |
| <i>Marinifilaceae</i>            |      | 0.00 | 1.95  | 11 | 0.63  | 1.37 | 2 | 3.20 |
| <i>Muribaculaceae</i>            | 0.01 | 0.04 | 43.01 | 11 | 11.18 | 4.18 | 4 | 7.61 |
| <i>Prevotellaceae</i>            |      | 0.00 | 1.62  | 9  | 0.69  | 0.04 | 0 | 0.06 |
| <i>Rikenellaceae</i>             | 0.05 | 0.00 | 9.92  | 11 | 1.76  | 0.88 | 2 | 1.65 |
