# Supplementary material for: A diet-specific microbiota drives Salmonella Typhimurium to adapt its in vivo response to plant-derived substrates
Source: PubMed Central journal article supplement (PMC7972205; doi:10.1186/s42523-021-00082-8), 2021-03-17
Supplement: 42523_2021_82_MOESM6_ESM.pdf [file 42523_2021_82_MOESM6_ESM.pdf]

**Table S5. Significant influences of the *S. Typhimurium* infection on the microbiota composition.** W, Wilcoxon Rank Sum Test; F, Fisher's Exact Test; n, number of mice harboring species; SD, standard deviation; WD, Westernized diet; PD, plant-based diet.

| <b>Family level (WD)</b>  |                    |                    |                      |    |        |          |    |        |
|---------------------------|--------------------|--------------------|----------------------|----|--------|----------|----|--------|
| Family                    | <i>p</i> value (W) | <i>p</i> value (F) | streptomycin treated |    |        | infected |    |        |
|                           |                    |                    | mean [%]             | n  | SD [%] | mean [%] | n  | SD [%] |
| <i>Coriobacteriaceae</i>  | 0.00               |                    | 7.39                 | 9  | 4.30   | 4.41     | 10 | 2.49   |
| <i>Deferribacteraceae</i> |                    | 0.02               | 23.94                | 11 | 24.12  | 1.79     | 5  | 2.57   |
| <i>Enterobacteriaceae</i> |                    | 0.00               | 0.43                 | 1  | 1.13   | 58.05    | 11 | 19.47  |
| <i>Lachnospiraceae</i>    |                    | 0.00               | 2.32                 | 8  | 3.38   | 0.12     | 0  | 0.06   |
| <i>Ruminococcaceae</i>    |                    | 0.00               | 2.11                 | 9  | 1.74   | 0.23     | 1  | 0.19   |

| <b>Family level (PD)</b>  |                    |                    |                      |   |        |          |    |        |
|---------------------------|--------------------|--------------------|----------------------|---|--------|----------|----|--------|
| Family                    | <i>p</i> value (W) | <i>p</i> value (F) | streptomycin treated |   |        | infected |    |        |
|                           |                    |                    | mean [%]             | n | SD [%] | mean [%] | n  | SD [%] |
| <i>Coriobacteriaceae</i>  | 0.13               |                    | 7.68                 | 7 | 5.03   | 2.23     | 8  | 2.45   |
| <i>Enterobacteriaceae</i> |                    | 0.01               | 9.96                 | 2 | 20.75  | 47.51    | 10 | 28.55  |
| <i>Lachnospiraceae</i>    |                    | 0.01               | 2.34                 | 6 | 3.90   | 0.89     | 1  | 2.52   |
| <i>Ruminococcaceae</i>    |                    | 0.01               | 2.66                 | 6 | 2.15   | 0.69     | 1  | 2.01   |
