# Supplementary material for: A diet-specific microbiota drives Salmonella Typhimurium to adapt its in vivo response to plant-derived substrates
Source: PubMed Central journal article supplement (PMC7972205; doi:10.1186/s42523-021-00082-8), 2021-03-17
Supplement: 42523_2021_82_MOESM7_ESM.pdf [file 42523_2021_82_MOESM7_ESM.pdf]

Table S6. Oligonucleotides used in this study.

| name                         | sequence 5'-3'                                                              | gene/target      | comment                          |
|------------------------------|-----------------------------------------------------------------------------|------------------|----------------------------------|
| Fwd <i>invA</i> _del         | GTCGTA CTATTGAAAAGCTGTCTTAATTTAATATTAACAGGATACCTATAGTGT<br>AGGCTGGAGCTGCTTC | <i>invA</i>      | deletion of <i>invA</i>          |
| Rev <i>invA</i> _del         | TAATTCAGCGATATCCAAATGTTGCATAGATCTTTTCCTTAATTAAGCCCCATAT<br>GAATATCCTCCTTA   | <i>invA</i>      | deletion of <i>invA</i>          |
| STM3254_Del_fw<br>d          | GCGGCTGTGAAGGGCAACTGTGAGGAATCGCCTGTGATCTACACGCTAACGTG<br>TAGGCTGGAGCTGCTTC  | STM3254          | deletion of<br>STM3254           |
| STM3254_Del_r<br>ev          | TATTGTAATTTAACCTACAGCTTTCTGACGTGGATTTGCGAAAGTAAGGTCATA<br>TGAATATCCTCCTTA   | STM3254          | deletion of<br>STM3254           |
| <i>gatR</i> _Del-<br>DR_fw   | GGAAGTCATCTGGCGGAAGGCGACAATCAGGAAGTCATTCTGGAAGATCGGTG<br>TAGGCTGGAGCTGCTTC  | <i>gatR</i> -HTH | deletion of <i>gatR</i> -<br>HTH |
| <i>gatR</i> _Del_HTH_r<br>ev | GCAGCCGCCTGGGCAATCCGCTTTTTCGGATCGCTGGCGAGTTGATACCGCATA<br>TGAATATCCTCCTTA   | <i>gatR</i> -HTH | deletion of <i>gatR</i> -<br>HTH |
